# Supplementary material for: A Descriptive Analysis of the Impact of COVID-19 on Emergency Department Attendance and Visit Characteristics in Singapore
Source: MDPI journal article supplement (doi:10.3390/covid1040059), 2021-12-06
Supplement: s1 [file s1]

Archive with 1 entries (1 files):
- covid-1442535-supplementary.pdf
