# Supplementary material for: A Descriptive Analysis of the Impact of COVID-19 on Emergency Department Attendance and Visit Characteristics in Singapore
Source: MDPI journal article supplement (doi:10.3390/covid1040059), 2021-12-06
Supplement: s1 [file s1 › covid-1442535-supplementary.pdf]

### Weekly ED attendance by triage class – Non-fever visits

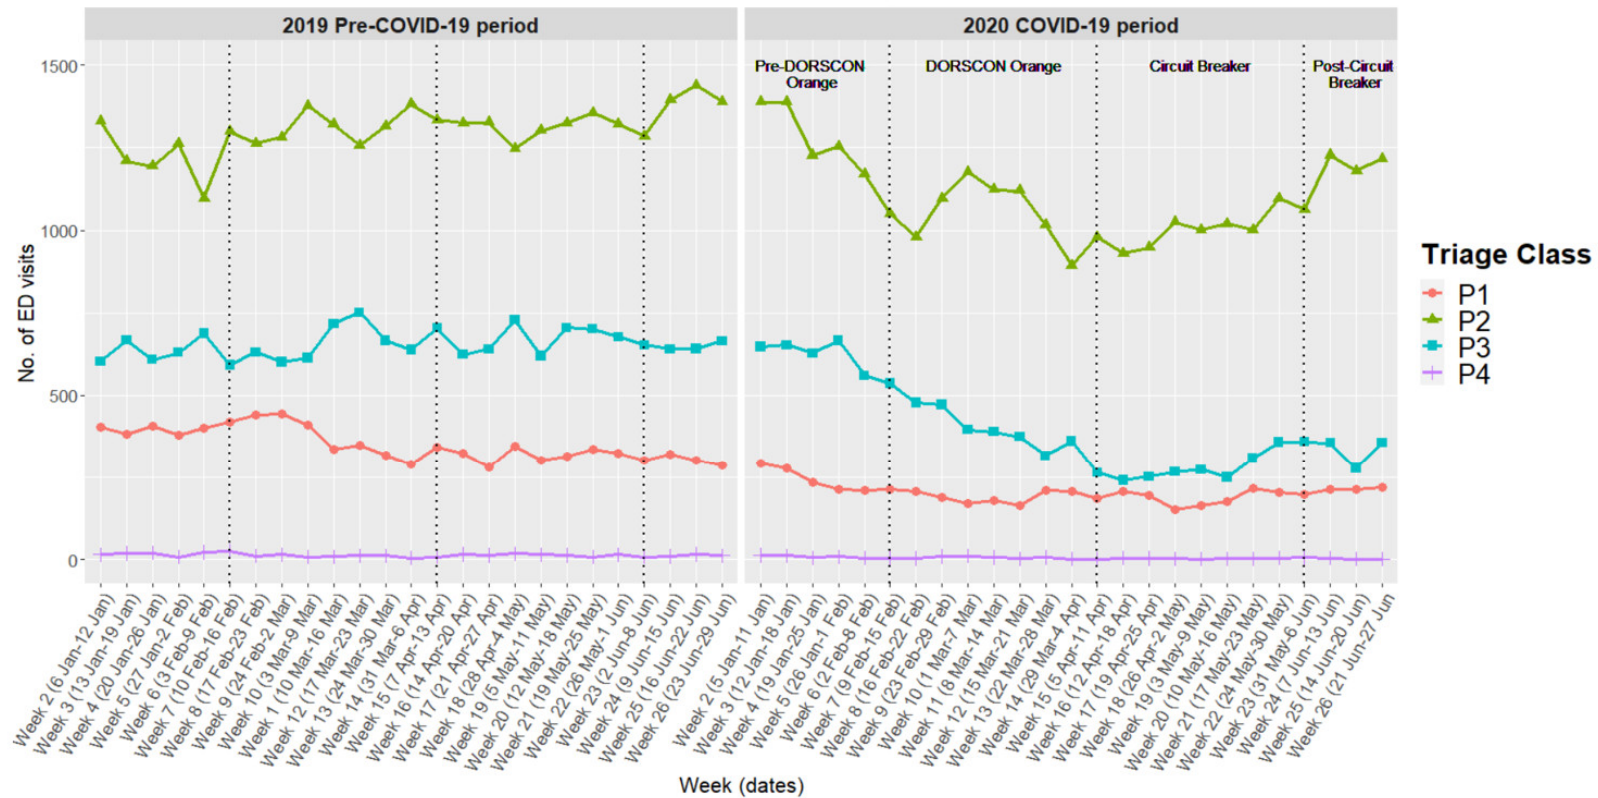

The number of visits across all 'Non-Fever' triage groups (P1-P4) declined during the COVID-19 period as compared to corresponding pre-COVID-19 period. The proportion of P3 visits dropped significantly over the COVID-19 period, reaching its lowest numbers during the Circuit Breaker phase. Epi-weeks were used for plotting and only completed epi-weeks 2 to 26 of each studied period were included in this figure.

**Figure S1.** Weekly ED attendance trend for each 'Non-Fever' triage group during the pre-COVID-19 and COVID-19 periods.
